# Supplementary material for: Ovarian Cancer Cell Line Panel (OCCP): Clinical Importance of In Vitro Morphological Subtypes
Source: PLoS One. 2014 Sep 17;9(9):e103988. doi: 10.1371/journal.pone.0103988 (PMC4167545; doi:10.1371/journal.pone.0103988)
Supplement: Table S1 — Background information on the origin of the cell lines based on literature. (XLSX) [file pone.0103988.s004.xlsx]

## Sheet: table
						Clinical information relevant to the cell lines
cellijn	origen		related cell lines	reference	histology	year generated	Origin	Time	grade	stage	Age	Race	Treated	Treatment (before generation of cell line)	Additional information on clinical progression
2774	University of Innsbruck, Austria			39	E	1972	A		2				U
59M	ECACC	89081802		40	Mixed		A	R		IA	65		U		Histology: Endometrioid with Clear Cell component. Presented with stage IA ovca and in situ carcinoma of the endometrium and tubes as second primaries, after laparotomy no treatment, after 2 years ascites and lump in breast diagnosed as metastatic ovarian cancer. following paracentesis, treated with ifosfamide & melphalan, stopped due to toxicity. patient died 10 months after paracentesis.
A2780	University of Innsbruck, Austria			34 (produced by Stuart A. Aaronson et al, NCI)		between 1982-1986	T				53		U		patient with omental metastasis
A2780 (ECACC)	ECACC	93112519		34 (produced by Stuart A. Aaronson et al, NCI)			T				53		U
A2780 ADR (ECACC)	ECACC	93112520	Adriamycin resistent variant of A2780				T				53		U
A2780 CIS (ECACC)	ECACC	93112517	Cisplatin resistent variant of A2780				T				53	C	U
CAOV3	ATCC	HTB-75		44 (produced by J. Fogh in 1976)	S	1976	T	P			54	C
CAOV4	ATCC	HTB-76		44 (produced by J. Fogh in 1976)	S	1976	TM fallopian tube				45	C
COLO720E	ECACC	93072111	This clone is most likely not COLO720E				A				73	Ch
COV318	ECACC	7071903		43	S		A
COV362	ECACC	7071910		42-43	E		P	R		adv			T	melphalan
COV362.4	ECACC	7071904	subline selected by agar cloning of early passage COV362	43	E		P	R		adv			T	melphalan
COV413A	ECACC	7071905	Same patient as COV413B, generated from sigmoid colon metastasis	42-43	S		TM sigmoid colon			adv			U
COV413B	ECACC	7071906	Same patient as COV413A, generated from bladder dome metastasis	43	S		TM bladder dome			adv			U
COV504	ECACC	7071902		43	S		P
COV644	ECACC	7071908		43	M		T	P
ES2	ATCC	CRL-1978		45-46	C		T		3		47	N
HOC7	University of Innsbruck, Austria			31-32	LGS	1980	A	R	1	III			T	1e-line: 1yr Melphalan (PR), 2nd-line: Adriamycin/CDDP/Cyclophosphamide (PR)-PFS 5m, 3rd-line: 7m untreated before ascites for HOC1&7, but treated with 2.5 mg Methotrexate for psoriasis
IGROV1	Utrecht University, The Netherlands			50	Mixed		TO	P	2	III	47	N	U		Histology: endometrioid for the major part of the tumor, with some serous clear cells and undifferentiated
OAW28	ECACC	85101601		40	S		A	CR			75		T	CDDP & melphalan (noR)	patient died 3 days after paracentesis.
OAW42	ECACC	85073102		40-41	S	1979	A	R		Ic	46		T	6x CDDP (CR)	Human ovarian tumour epithelial, FIGO Ic, laporotomy (large right ovarian cyst with solid areas, pap. serous) no treatment, 6months later ascites, hepatomegaly, 8x4cm abdominal mass (ascites for OAW8), 6x CDDP (CR-laparotomy showed partial response,march1980), residual disease (bowel/omentum) removed, total abdominal radiation, relapse, ascites for OAW42 (june1980), patient died 1 month after par…
OV17R	ECACC	96020763		33			A	R	ND	III	50		T	Carbo,Cyprotorone&Tamoxifen
OV56	ECACC	96020759		33	HGS		A	P	3	IV	46		U		Patient treated with Carboplatin
OV7	ECACC	96020764		33	Mixed		T	P	3	III	78		U		Patient treated with Chlorambucil
OV90	ATCC	CRL-11732		37-38	HGS	1992	A		3	IIIC	64	FC			Survival was 18m
OVCAR3	ATCC	HTB-161		34-35	HGS	1982	A	R	3	progr	60	C	T	Cyclophosphamide, CDDP, Adriamycin	Patient developed ascites (OVCAR3) 8m after diagn and treatment (Cyclophosphamide, CDDP, Adriamycin)
PEA1	ECACC		same patient as PEA2, before treatment	48	HGS		P	P	3				U		PEA1 before treatment and PEA2 at Pt-resistance 6m after treatment
PEA2	ECACC		same patient as PEA1, at Pt-resistance 6m after treatment	48	HGS		A	R	3				T	6x CDDP&prednimustine (res)	PEA1 before treatment and PEA2 at Pt-resistance 6m after treatment
PEO1	ECACC		same patient as PEO4, first relapse, platinum responsive	47-48	HGS	1980	A	R	3	III			T	7x CDDP, 5FU, Chlorambucil (CR, relapse 14mnths)	Germline BRCA2 mutation. Relapse 22m after CDDP-based treatment primary disease (PEO1), Platinum-based chemotherapy (response), 10m later relapse (PEO4), high-dose CDDP (PD), 3m later (PEO6)
PEO4	ECACC		same patient as PEO1, second relapse, platinum resistant	47-48	HGS	1980	A	CR	3	III			T	6x CDDP, 5FU, Chlorambucil (res)	Revertant germline BRCA2 mut. Relapse 22m after CDDP-based treatment primary disease (PEO1), Pt-based chemotherapy (response), 10m later relapse (PEO4), high-dose CDDP (PD), 3m later (PEO6)
PEO14	ECACC		same patient as PEO23, before treatment	48	LGS		A	P	1				U		PEO14 before treatment and PEO23 at Platinumt-resistance 7m after treatment
PEO23	ECACC		same patient as PEO14, at platinum resistance	48	LGS		A	R	1				T	CDPP and chlorambucil	PEO14 before treatment and PEO23 at Platinumt-resistance 7m after treatment
PEO16	ECACC			48	HGS		A		3				R	Radiotherapy
SKOV3	University of Innsbruck, Austria			29-30	S	1973	A		1/2		64	C	T	Thiotepa
SKOV3 (ECACC)	ECACC	91091004		29-30	S	1973	A		1/2		64	C	T	Thiotepa
SKOV6	University of Innsbruck, Austria			36
TOV112D	ATCC	CRL-11731		38	E	1992	T	P	3	IIIC	42	FC	U		patient died within 3m despite optimal cytoreductive surgery and platinol-based chemotherapy
TOV21G	ATCC	CRL-11730		38	C	1991	T	P	3	III	62	FC	U		patient died of post-operative complications
UWB1.289	ATCC	CRL-2945	Germ-line BRCA1 mutation (exon11_2594delC)	49	S		T	R			54		T	1e-line: carbo/taxol (CR), 2nd-line: topotecan (PD)- gemcitabin&adriamycin (PR)	patient developed breast cancer at age 42, ovarian cancer at 54-optimal cytoreduction-6xCarbo/taxol(CR)+3xtaxol-PFS 3m-Relapse: 3x topotecan (PD)-gem&adria (PR)-1m later surgery (entrovaginal fistula) tumortissue for UWB1.289, 7wks later patient died at age 56 (BRCA1 mut exon11_2594delC, leads to stop codon & deletion of WT allele)
UWB1.289+BRCA1	ATCC	CRL-2946	UWB1.289 cell line with pcDNA3 plasmid carrying wild-type BRCA1	49	S		T	R			54		T	1e-line: carbo/taxol (CR), 2nd-line: topotecan (PD)- gemcitabin&adriamycin (PR)	UWB1.289 cell line with pcDNA3 plasmid carrying wild-type BRCA1

## Sheet: legend
A	ascites		P	primary disease		T	treated		C	Caucasian
T	tumor tissue		R	Recurrence/relapse		U	untreated		N	Negroid
TM	metastasis		CR	when clinical resistant		R	radiotherapy		FC	French-Canadian
TO	ovary tissue								Ch	Chinese
P	pleural effusion
	CDDP Cisplatin, 5FU Fluorouracil, CR complete response, PR partial response, PD progressive disease, noRes no response, Res response
