# Supplementary material for: Ovarian Cancer Cell Line Panel (OCCP): Clinical Importance of In Vitro Morphological Subtypes
Source: PLoS One. 2014 Sep 17;9(9):e103988. doi: 10.1371/journal.pone.0103988 (PMC4167545; doi:10.1371/journal.pone.0103988)
Supplement: Table S3 — Short tandem repeat profiles of 39 cell lines measured with the PowerPlex 16 system (in bold) compared to the reference STR profiles from the cell line banks ECACC and ATCC (in italic) and STR profiles measured by Korch et al. (in regular font). See Korch et al. [29] for the origin of these cell lines. nd not determined. (XLSX) [file pone.0103988.s006.xlsx]

## Sheet: SuppTable
Short tandem repeat profiles of 39 ovarian cancer cell lines measured with the PowerPlex 16 system (in bold) compared to the reference STR profiles from the cell line banks ECACC and ATCC (in italic) and STR profiles measured by Korch et al (in regular font). See Korch et al for the origin of these cell lines. nd not determined
Cell Line	Origin	concordance	Amelogenin	CSF1PO	D2S1338	D3S1358	D5S818	D7S820	D8S1179	D13S317	D16S539	D18S51	D19S433	D21S11	FGA	THO1	TPOX	vWA	Penta E	Penta D
		with references	Xp22.1-22.3	5q33.3-34 (AGAT)	2q35 (TTCC)	3p (TCTA)	5q23.3-32 (AGAT)	7q11.21-22 (GATA)	8q (TCTA)	13q22-q31 (TATC)	16q24-qter (GATA)	18q21.3 (AGAA)	19q12 (AAGG)	21q11-21q21 (TCTA)	4q28 (TTTC)	11p15.5 (AATG)	2p24-2pter (TCTA)	12p12-pter (TCTA)	15q (AAAGA)	21q (AAAGA)
2774	Academic lab	0.86	X	10, 11	nd	16, 18	10, (11), 12	10, 11, (11.1), 12, (12.1)	14	8, 9	10, 11, 12	(14), 15	nd	30, 31	24, 25	6, 8	8	15, 19	13, 14	13, 14
2774	see Korch et al.		X	10, 11	19, 24	16, 17, 18	10, 11, 12	10, 11, 11.1	14	8, 9	11, 12	14, 15	14	30, 31	23, 24	6, 8	8	14, 19	nd	nd
59M	ECACC: 89081802	1	X	13	nd	15, 17	11	10	10, 14	11	9	12	nd	31	22.2	7	8	17, 19	15	8
59M	ECACC: 89081802		X	nd	19, 20	15, 17	nd	nd	*oa	nd	9	12	14, *16	31	22.2	7	nd	17, 19	nd	nd
A2780	Academic lab		X	10, 11	nd	14, 16	11, 12	10	15, 17	12, 13	11, 13	16, 18	nd	28	19, 24	6	8, 10	15, 16	10, 13	8, 9
A2780	ECACC: 93112519	0.89	X	10, 11	nd	14, 16, 17	11, 12	10	15, 17, (18)	12, 13	11, (12), 13	16, 18	nd	28	19, 24	6	8, 10	15, 16	10, 13	8, 9
A2780	see Korch et al.		X	10, 11	21, 22	14, 16	11, 12	10	15, 17	12, 13	11, 13	16, 18	12	28	19, 24	6	8, 10	15, 16	nd	nd
A2780	ECACC: 93112519		X	nd	21, 22	14, 16	nd	nd	15, 17	nd	11, 13	0, 0??	12	28	19, 24	6	nd	15, 16	nd	nd
A2780	Masters: 184, see Korch et al.		X	nd	nd	nd	nd	nd	15, 17	nd	nd	16, 18	nd	28	19, 24	6	nd	15, 16	nd	nd
A2780ADR	ECACC: 93112520	0.95	X	10, 11	nd	14, 16	11, 12	10, (9)	14, 15, 16, 17	(12), 13	11, 14	15	nd	28	19, 25	6	8, 9	15, 16	10, 13	8, 9
A2780ADR	ECACC: 93112520		x	10, 11	nd	nd	11, 12	10	nd	13	11, 14	nd	nd	nd	nd	6	8, 9	15, 16	nd	nd
A2780ADR	ECACC: 93112520		X	nd	21, 22	14, 16	nd	nd	*mp	nd	11, 14	15	12	28	19, 25	6	nd	15, 16	nd	nd
A2780CIS	ECACC: 93112517	0.98	X	10, 11	nd	13, 16	11, (12)	10	15, 18	13	11, 13	16, 17	nd	28	19, 24	6	8, 10	15, 16	10, 13	8, 9
A2780CIS	ECACC: 93112517		X	10, 11	nd	nd	11	10	nd	13	11, 13	nd	nd	nd	nd	6	8, 10	15, 16	nd	nd
A2780CIS	ECACC: 93112517		X	nd	21, 23	13, 16	nd	nd	15, 18	nd	11, 13	mp	12	28	19, 24	6	nd	15, 16	nd	nd
A2780cisR	see Korch et al.		X	10, 11	21, 22	14, 17	11, 12	10	15, 17	12, 13, 14	11, 13, 14	15, 16, 18, (17, 19)	11, 12	28, (29)	19, 24	6	8, 10	15, 16	nd	nd
A2780Mut	see Korch et al.		X	10, 11	21, 22	14, 16	11, 12	10	15, 17	12, 13	11, 13	16, 18	12	28	19, 24	6	8, 10	15, 16	nd	nd
CAOV3	ATCC: HTB-75	1	X	10, 13	nd	16	12	10	9, 14	12	9	18	nd	30	24	7	8, 10	16, 18	11, 15	12
Caov-3	see Korch et al.		X	10, 13	16, 17	16	12	10	9, 14	12	9	18	14, 17	30	24	7	8, 10	16, 18	nd	nd
Caov-3	ATCC: HTB-75		X	10, 13	nd	nd	12	10	nd	12	9	nd	nd	nd	nd	7	8, 10	16, 18	nd	nd
CAOV4	ATCC: HTB-76	1	X	10	nd	16	11	8, 10	12	12, 14	9, 11	21	nd	28, 33.2	22	6, 9.3	8, 9	16, 17	12, 13	9, 10
CAOV4	ATCC: HTB-76		N/A	N/A	nd	nd	N/A	N/A	nd	N/A	N/A	nd	nd	nd	nd	N/A	N/A	N/A	nd	nd
COLO720E	ECACC: 93072111	0.04	X	10, 12	nd	17	12, 15	11, 13	11, 12	9, 12	12, 13, 14	14	nd	27, 31.2	20, 23	7, 9.3	8	15, 16	11, 12	10.4, 12
COLO720E	ECACC: 93072111		X	nd	18, 22	17	nd	nd	11, 12	nd	0, 0??	14	14, 15	27, 31.2	20, 23	7, 9.3	nd	15, 16	nd	nd
COLO720E	see Korch et al.		X	11, 13	18, 24	15, 17	10, 11	10	10, 13	8, 11	11	12, 16	13, 15.2	28, 32.2	21, 25	9	11	14	nd	nd
COV318	ECACC: 07071903	1	X	11, 13	nd	14, 16	11, 13	9	12, 13	14	9, 12	12	nd	30	20, 23	9.3	8, 11	15	7	10
COV318	ECACC: 07071903		X	11, 13	17, 27	14, 16	11, 13	9	12, 13	14	9, 12	12	13.2	30	20, 23	9.3	8, 11	15	nd	nd
COV362	ECACC: 07071910	1	X	11, 12	nd	16, 18	13	10, 14	11	14	11	13	nd	31, 32.2	23, 24	9.3	11	15, 18	7, 11	9
COV362	ECACC: 07071910		X	nd	24, 25	16, 18	nd	nd	11	nd	11	13	14	31, 32.2	23, 24	9.3	nd	15, 18	nd	nd
COV362.4	ECACC: 07071904	1	X	11, 12	nd	16, 18	13	10, 14	11	14	11	13	nd	31, 32.2	24	9.3	11	15, 18	7, 11	9, 11
COV362.4	ECACC: 07071904		X	nd	24, 25	16, 18	nd	nd	11	nd	11	13	14	31, 32.2	24	9.3	nd	15, 18	nd	nd
COV413A	ECACC: 07071905	1	X	10, 11	nd	14	9, 12	8, 13	13, 14	12	11	18	nd	31.2	19	6	9	17	12, 14	14
COV413A	ECACC: 07071905		X	nd	17	14	nd	nd	13, 14	nd	11	18	14, 15	31.2	19	6	nd	17	nd	nd
COV413B	ECACC: 07071906	1	X	10, 11	nd	14	9, 12	8, 13	13, 14	12	11	16	nd	31.2	19	6	9	17	12, 14	14
COV413B	ECACC: 07071906		X	nd	17	14	nd	nd	13, 14	nd	11	16	14, 15	31.2	19	6	nd	17	nd	nd
COV504	ECACC: 07071902	1	X	12, 13	nd	16	11	10, 12	12, 13	9, 11	9, 11	13	nd	29	22	6, 7	8, 9	17, 18	7, 16	13
COV504	ECACC: 07071902		X	nd	17, 19	16	nd	nd	12, 13	nd	9, 11	13	15	29	22	6, 7	nd	17, 18	nd	nd
COV644	ECACC: 07071908	1	X	10	nd	17, 18	10, 11	8, 11	12, 14	9, 11	11, 12	14	nd	29	21, 23	8	9, 11	16, 17	18	10
COV644	ECACC: 07071908		X	nd	17, 18	17, 18	nd	nd	12, 14	nd	11, 12	14	13, 16.2	29	21, 23	8	nd	16, 17	nd	nd
ES2	ATCC: CRL-1978	0.99	X	10, 15	nd	15, 18	11, 13	11	14	11	11, 13	13, 15	nd	32.2	21	9.3	8, 12	16, 17	13, 16	8, 13
ES-2	see Korch et al.		X	10, 15	17, 23	15, 18	11, 13	11	14	11	11, 13	13, 15	15, 15.2	32.2, 33.2	21	9.3	8, 12	16, 17	nd	nd
ES-2	ATCC: CRL-1978		X	10, 15	nd	nd	11, 13	11	nd	11	11, 13	nd	nd	nd	nd	9.3	8, 12	16, 17	nd	nd
HOC7	Academic lab		X	11	nd	15	11, 12	8, 9	12, 14	9, 11	9	14	nd	30, 31.2	23, 25	9.3	8, 11	14, 16	7, 12	13
IGROV1	Academic lab	0.79	X	11, 16	nd	13, 14, 15	12, 13	9.1, 10.1, 11.1	14, 16	8, 10	12	14, 16, 17	nd	26, 29.2, 30.2	20, 21, 26	7, 9.3	8, 11	16, 17, 20, 22	13, 17	8, 10
IGROV1	NCI-60		X	11, 13	17, 25	13, 15	12, 13	0, 0	14, 16	8, 10	11, 12	15, 16	13, 14	26, 30.2	21, 26	7, 9.3	8, 11	17, 21	nd	nd
IGROV1	National Cancer Institute, Korch et al.		X	11, 13, 15	17, 24, 25	13, 14, 15	12, 13	10.1, 10.3, 11.1	14, 15, 16	8, 10	11, 12	14, 15, 16	13, 14	26, 30.2	20, 21, 26	7, 9.3	8, 11	16, 17, 21, 22	nd	nd
IGROV1	Korch et al.		X	11, 13, 15	17, 24, 25	13, 14, 15	12, 13	10.1, 10.3, 11.1	14, 15, 16	8, 10	11, 12	14, 15, 16	13, 14	26, 30.2	20, 21, 25, 26	7, 9.3	8, 11	17, 20, 21, 22	nd	nd
IGROV1	Korch et al.		X	9, 10, 11, (14), 15	17, 18, 26, 27, 28	13, 14, 15	8, 12, 13	9, 9.1, 10, 10.1, 10.2, 11.2	13, 14, 15	8, 9, 10	10, 11, 12	14, 15, 16	13, 14	26, 30.2	22, 23, 25	7, 9.3	8, 11	17, 18, 19, 20, 21, 22	nd	nd
OAW28	ECACC: 85101601	1	X	11	nd	14, 18	12	11	11, 15	11	13	12, 14	nd	29	21, 24	9	8	17, 19	7	9
OAW28	ECACC: 85101601		X	nd	20, 23	14, 18	nd	nd	11, 15	nd	13	12, 14	13	29	21, 24	9	nd	17, 19	nd	nd
OAW42	ECACC: 85073102	0.9	X	11	nd	15, 16	11, 12	8	13	11	12, 13	16, 21	nd	26	22, 25	6, 7	8, 11	14, 16	12	10
OAW42	ECACC: 85073102		X	11	17	15, 16	11, 12	8.2	13	11	12, 13	16, 21	13, 14	26	22, 25	6, 7	8, 11	15, 16	nd	nd
OV17R	ECACC: 96020763	0.97	X	11, 14	nd	14, 17	11	8, 10	13, 14	11, 13	9, 13	13, 18	nd	30	21, 22	9, 9.3	8, 10	14, 18	14	10, 13
OV17R	ECACC: 96020763		X	nd	24, 25	14, 17	nd	nd	13, 14	nd	9, 13	13, 18	14, 16	30	21, 22	9	nd	14, 18	nd	nd
OV56	ECACC: 96020759	1	X	11	nd	16, 17	11, 12	10	8, 14	8, 9	10, 13	14	nd	28	21	6, 9	9, 11	15, 19	12, 20	13, 15
OV56	ECACC: 96020759		X	nd	20, 24	16, 17	nd	nd	8, 14	nd	10, 13	14	13, 15	28	21	6, 9	nd	15, 19	nd	nd
OV7	ECACC: 96020764	1	X	12, 13	nd	16	11, 12	9, 11	10, 14	8, 11	13	12, 14	nd	30, 31.2	23	7, 9.3	8, 10	15	10, 12	12, 14
OV7	ECACC: 96020764		X	nd	20, 24	16	nd	nd	10, 14	nd	13	12, 14	14	30, 31.2	23	7, 9.3	nd	15	nd	nd
OV90	ATCC: CRL-11732	1	X	12, 13	nd	18	11, 15	10, 10.1	12, 14	11, 12	11	12	nd	30, 30.2	21, 22	9.3	8, 10	16, 17	11, 13	12, 13
OV90	ATCC: CRL-11732		x	12, 13	nd	nd	11, 15	10, 10.1	nd	11, 12	11	nd	nd	nd	nd	9.3	8, 10	16, 17	nd	nd
OV-90	see Korch et al.		X	12, 13	17	18	11, 15	10, 10.1	12, 14	11, 12	11	12	13	30, 30.2	21, 22	9.3	8, 10	16, 17	nd	nd
OVCAR3	ATCC: HTB-161	1	X	11, 12	nd	17, 18	11, 12	10	10, 15	12	12	13	nd	29, 31.2	21	9, 9.3	8	17	7, 13	12, 13
OVCAR3	NIH: OVCAR-3, ATCC: (HTB-161), & RIKEN: RCB 2135		X	11, 12	nd	nd	11, 12	10	nd	12	12	nd	nd	nd	nd	9, 9.3	8	17	nd	nd
OVCAR3 (NIH:OVCAR-3)	see Korch et al.		X	11, 12	17, 21	17, 18	11, 12	10	10, 15	12	12	13	16.2	29, 31.2	21	9, 9.3	8	17	nd	nd
PEA1	ECACC: 10032306	1	X	14	nd	16, 17	11	10	14	8	12, 13	14, 17	nd	30	22, 25	9	8, 12	18	7, 13	13, 15
PEA1	ECACC: 10032306		X	14	19, 25	16, 17	11	10	14	8	12, 13	14, 17	12, 13	30	22, 25	9	8, 12	18	nd	nd
PEA2	ECACC: 10032307	0.97	X	11, 14	nd	16	11, 13	10, 12	14	8	12, 13	17	nd	30	25	9	8, 12	17, 18	7, 13	13, 15
PEA2	ECACC: 10032307		X	11, 14	19	16	11, 13	10, 12	14	8	12, 13	17	12, 13	30	25	9	8	17, 18	nd	nd
PEO1	ECACC: 10032308	0.99	X	10, 12	nd	16	11, 12	10	13, 14	10	9	16, 17	nd	32.2	20	9.3	9, 11	15, 16	11, 12	14
PEO1	see Korch et al.		X	10, 12	20, 21	16	11, 12	10	13, 14	10	9	16, 17	13, 15	32.2	20	9.3	9, 11	15, 16	nd	nd
PEO1	ECACC: 10032308		X	10, 12	20, 21	16	11, 12	10	13	10	9	16, 17	13, 15	32.2	20	9.3	9, 11	15, 16	nd	nd
PEO14	ECACC: 10032311	1	X	11	nd	16, 18	12	9, 10	13, 14	11, 12	11	15	nd	27, 30	20	6	8, 11	15, 16	10	9, 13
PEO14	ECACC: 10032311		X	11	19	16, 18	12	9, 10	13, 14	11, 12	11	15	14, 15	27, 30	20	6	8, 11	15, 16	nd	nd
PEO16	ECACC: 10032312	1	X	12	nd	16	11	8	14, 15	13	12	12, 19	nd	30	19, 22	7	8, 11	15	7	13
PEO16	ECACC: 10032312		X	12	20, 23	16	11	8	14, 15	13	12	12, 19	13, 14.2	30	19, 22	7	8, 11	15	nd	nd
PEO23	ECACC: 10032313	1	X	11	nd	16	12	9, 10	13, 14	11, 12	11	15	nd	27, 30	20	6	8, 11	15, 16	10	9, 13
PEO23	ECACC: 10032313		X	11	24	16	12	9, 10	13, 14	11, 12	11	15	14, 15	27, 30	20	6	8, 11	15, 16	nd	nd
PEO4	ECACC: 10032309	1	X	10, 12	nd	16	11, 12	10	13, 14	10	9	16, 17	nd	30, 32.2	20	9.3	9, 11	15, 16	11, 12	9, 14
PEO4	see Korch et al.		X	10, 12	20, 21	16	11, 12	10	13, 14	10	9	16, 17	13, 15	30, 32.2	20	9.3	9, 11	15, 16	nd	nd
PEO4	ECACC: 10032309		X	10, 12	20, 21	16	11, 12	10	13, 14	10	9	16, 17	13, 15	30, 32.2	20	9.3	9, 11	15, 16	nd	nd
PEO6	see Korch et al.		X	10, 12	20, 21	16	11, 12	10	13, 14	10	9	16	13, 15	30	20	9.3	9, 11	15, 16	nd	nd
SKOV3	Academic lab	0.83	X	11, 12	nd	14	11	13	14, 15	8, 11	12	16, 18	nd	30, 31.2	24, 25	8, 9, 9.3	8, 11	17	5, (13)	12, 13
SKOV3	ATCC: HTB-77		x	11	nd	nd	11	13, 14	nd	8, 11	12	nd	nd	nd	nd	9, 9.3	8, 11	17, 18	nd	nd
SK-OV-3	see Korch et al.		X	11	18, 23	14	11	13, 14	14, 15	8, 11	12	16, 17, 18	14, 14.2	30, 31, 31.2	24, 25, (26, 23)	9, 9.3	8, 11	17, 18	nd	nd
SK-OV-3	Masters: 216		X	nd	nd	nd	nd	nd	14, 15	nd	nd	nd	nd	30, 31, 31.2	24, 25, 26	9, 9.3	nd	17, 18	nd	nd
SK-OV-3	NCI-60		X	11	18, 23	13, 14	11	13, 14	14, 15	8, 11	12	16, 17	14, 14.2	30, 31.2	nd	9, 9.3	8, 11	18	nd	nd
SKOV3 (ECACC)	ECACC: 91091004	0.95	X	11	nd	14	11	13, (14)	14, 15	8, 11	12	16, 17	nd	30, 31.2	23, 24, 25	9, 9.3	8, 11	17, 18	5, 13	12, 13
SKOV3 (ECACC)	ECACC: 91091004		X	nd	18, 23	14	nd	nd	14, 15	nd	12	16, 17	14, 14.2	30, 31.2	24, 25	9, 9.3	nd	17, 18	nd	nd
SKOV6	Academic lab		X	11	nd	15, 17	10, 12	8, 11	12, 13	11	12	15	nd	31.2, 32.2	21, 27, 28	10	(8), 9	15, 18	12	(9), 11
TOV112D	ATCC: CRL-11731	0.93	X	12	nd	15	10	9, 10	9, 13	8	11, 12	17	nd	31	20	6	8, 11	18	11	9
TOV112D	see Korch et al.		X	12	19, 24	15	10	9, 10	9, 13	8	9, 12	17	14	31	20	6	8, 11	18	nd	nd
TOV-112D	ATCC: CRL-11731		X	12	nd	nd	10	9, 10	nd	8	9, 12	nd	nd	nd	nd	6	8, 11	18	nd	nd
TOV21G	ATCC: CRL-11730	0.92	X	13, 15	nd	14, 16	12, 13	12	13, 16	11, 12	10, 12	(11), 12	nd	28, 34.2	20, 23	7, 9.3	8, 10	17	17, 19	9
TOV21G	ATCC: CRL-11730		x	13, 15	nd	nd	12, 13	12	nd	11, 12	10, 12	nd	nd	nd	nd	7, 9.3	8, 11	17	nd	nd
TOV21-G	see Korch et al.		X	13, 15	17	14, 16	12, 13	12	13, 16	11, 12	10, 12	12, 16	14, 16.2	28, 34.2	20, 23	7, 9.3	8, 11	17	nd	nd
UWB1.289	ATCC: CRL-2945	1	X	11	nd	14, 15	13	7, 10	12	9	12	19	nd	28, 31	22	9	9, 11	16, 19	8	10
UWB1.289	ATCC: CRL-2945		x	11	nd	nd	13	7, 10	nd	9	12	nd	nd	nd	nd	9	9, 11	16, 19	nd	nd
UWB1.289+BRCA1	ATCC: CRL-2946	1	X	11	nd	14, 15	13	7, 10	12	9	12	19	nd	28, 31	22	9	9, 11	16, 19	8	10
UWB1.289+BRCA1	ATCC: CRL-2946		x	11	nd	nd	13	7, 10	nd	9	12	nd	nd	nd	nd	9	9, 11	16, 19	nd	nd
